# Supplementary material for: Comparison between mechanochemical and solution synthesis of Zn and Cu complexes containing pyridine and p-halogen substituted benzoates
Source: Royal Society of Chemistry journal article supplement (doi:10.1039/d4mr00150h), 2025-01-01
Supplement: d4mr00150h1.pdf [file d4mr00150h1.pdf]

## Electronic supporting information

# Comparison between mechanochemical and solution synthesis of Zn and Cu complexes containing pyridine and p-halogen substituted benzoates

Giorgio Cagossi, Paolo Pio Mazzeo, Alessia Bacchi and Paolo Pelagatti\*

Department of Chemical Sciences Live Science and Environmental Sustainability, Università di  
Parma, Parco Area delle Scienze 17/A, 43124 Parma, Italy

paolo.pelagatti@unipr.it

### Content:

|                                                                              |    |
|------------------------------------------------------------------------------|----|
| • FT-IR ATR spectra (Figure S1)                                              | 2  |
| • Powder X-Ray diffraction patterns (Figures S2-S3)                          | 3  |
| • Rietveld refinement (Figure S4)                                            | 4  |
| • VT-PXRD of <b>2m</b> dehydration (Figure S5)                               | 6  |
| • Thermogravimetric analysis (Figure S6)                                     | 7  |
| • Crystal Structure solved by SC-XRD (Figures S7-S14)                        | 8  |
| • Crystallographic Table for <b>1s</b> , <b>2s</b> , <b>3s</b> and <b>8s</b> | 12 |

## FT-IR ATR spectra

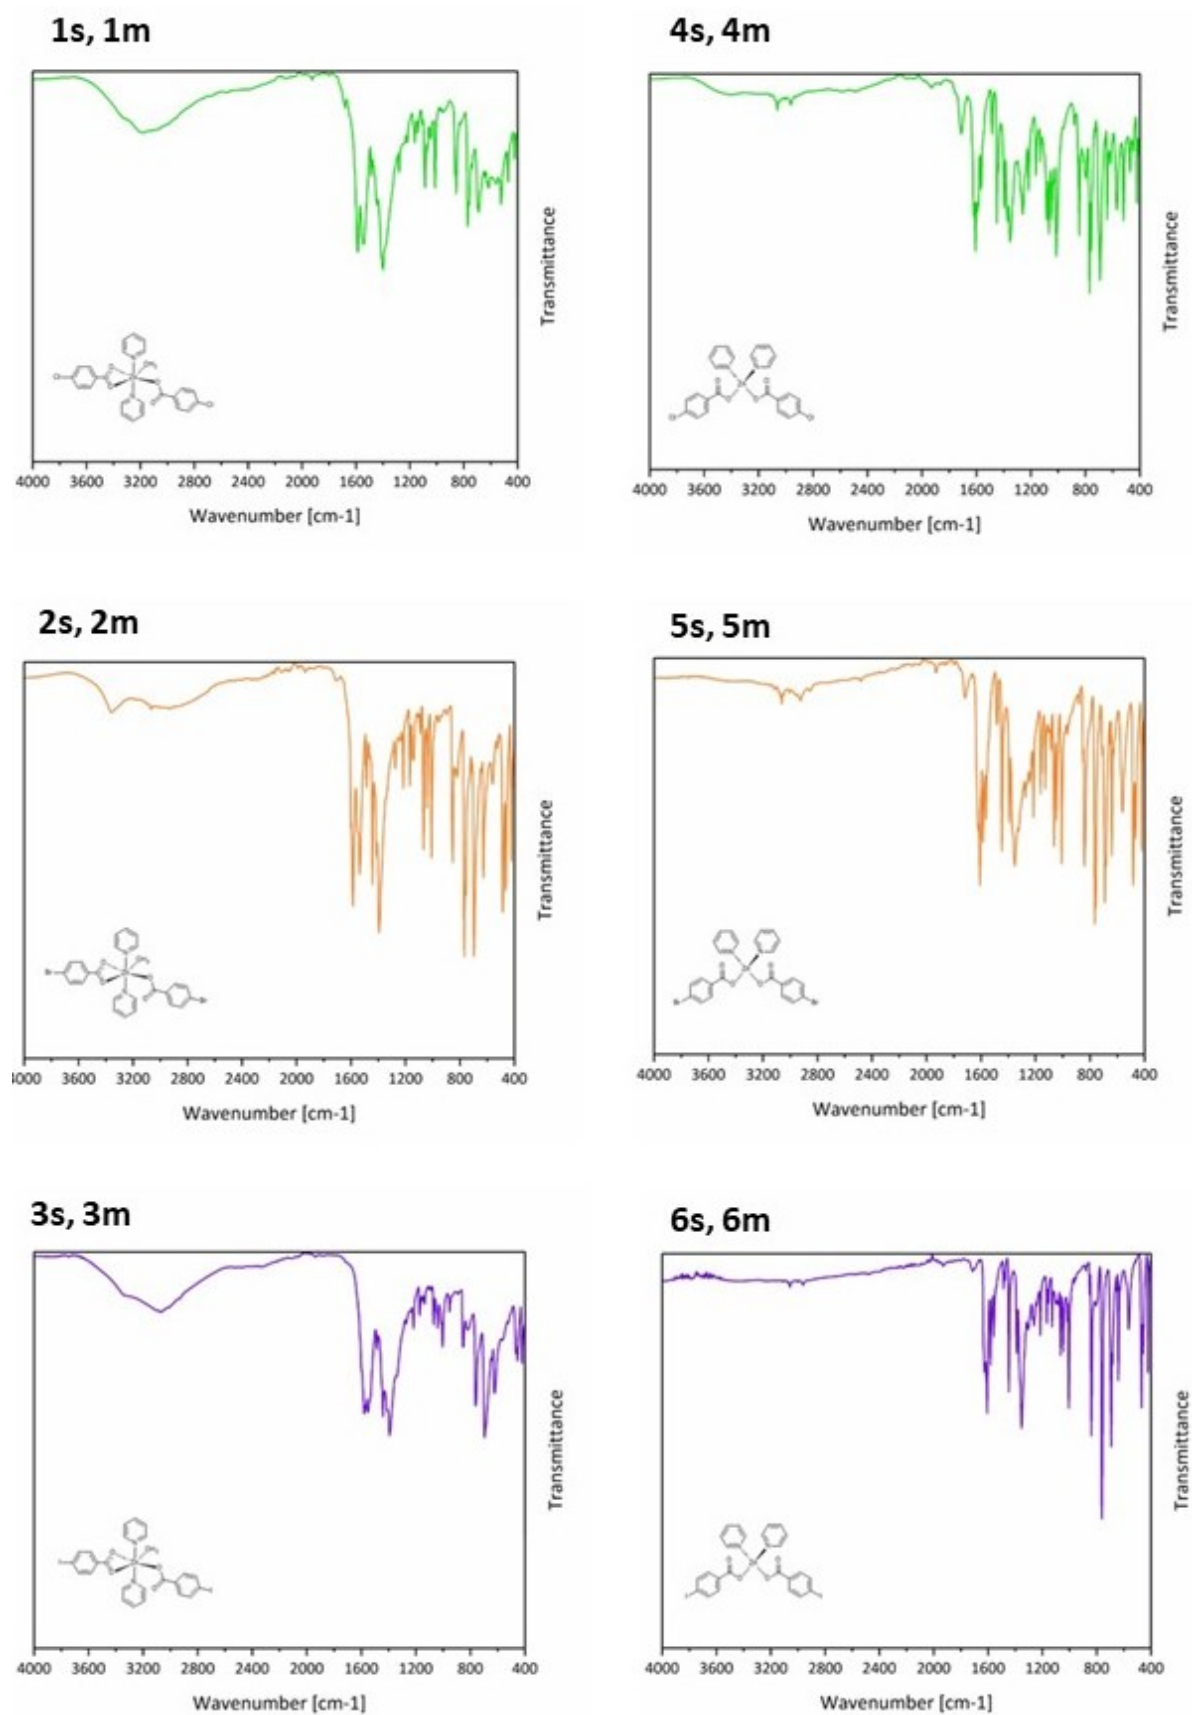

Figure S1. FTIR spectra of complexes

## Powder X-Ray diffraction patterns

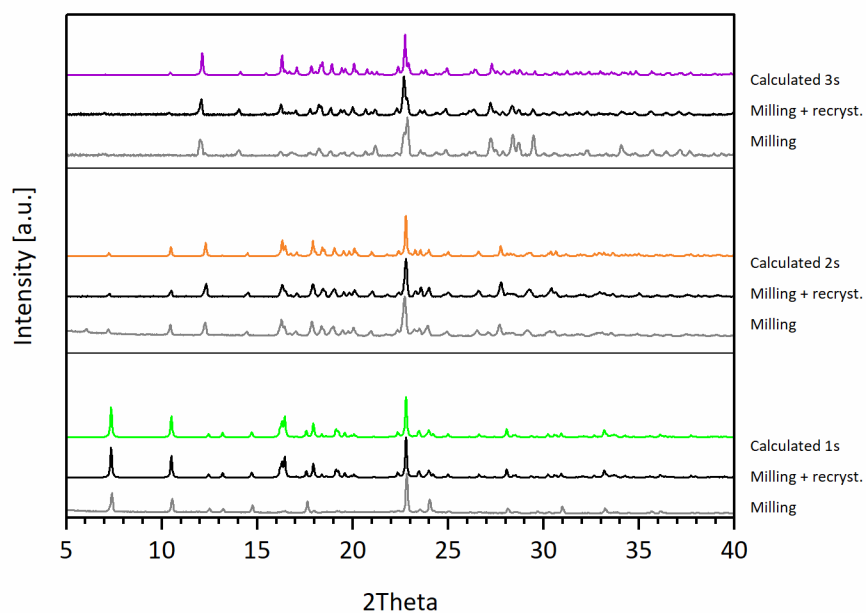

Figure S2. Comparison between experimental XRPD of **1m**, **2m** and **3m** (30Hz and 30min of milling) following a recrystallization step and those calculated from **1s**, **2s** and **3s**.

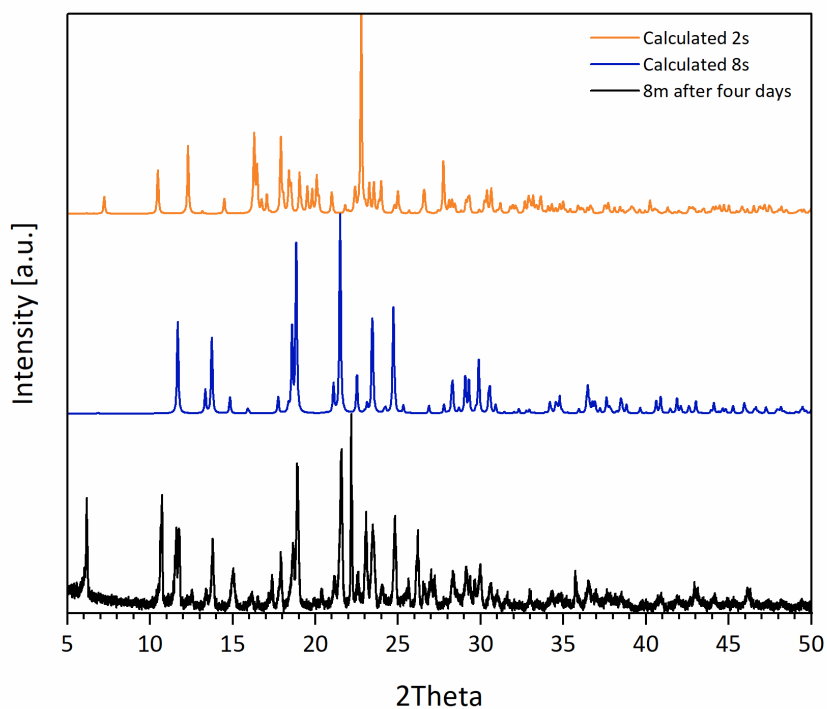

Figure S3. Comparison between experimental XRPD of **8m**, after 4 days left in open air and those calculated from **2s** and **8s**.

## Rietveld refinements

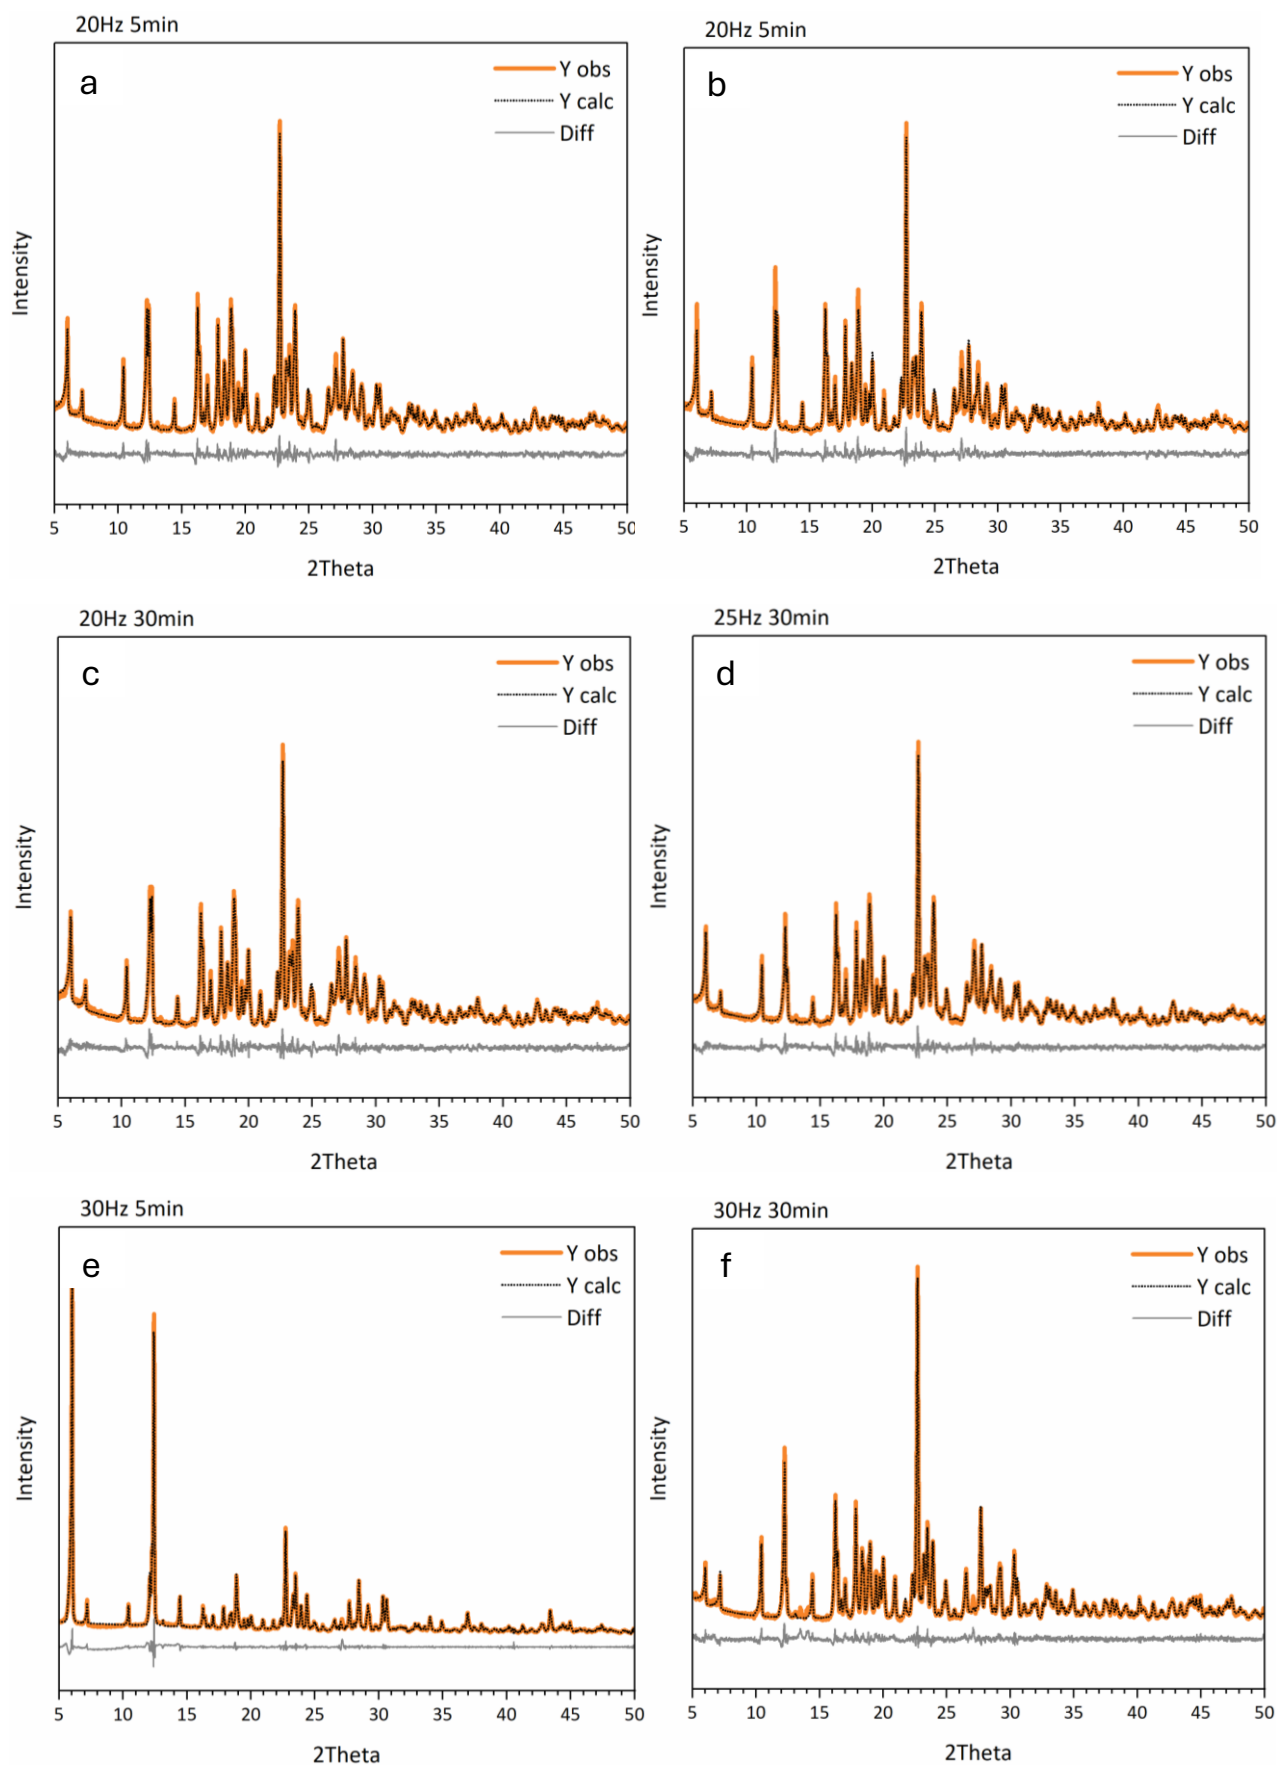

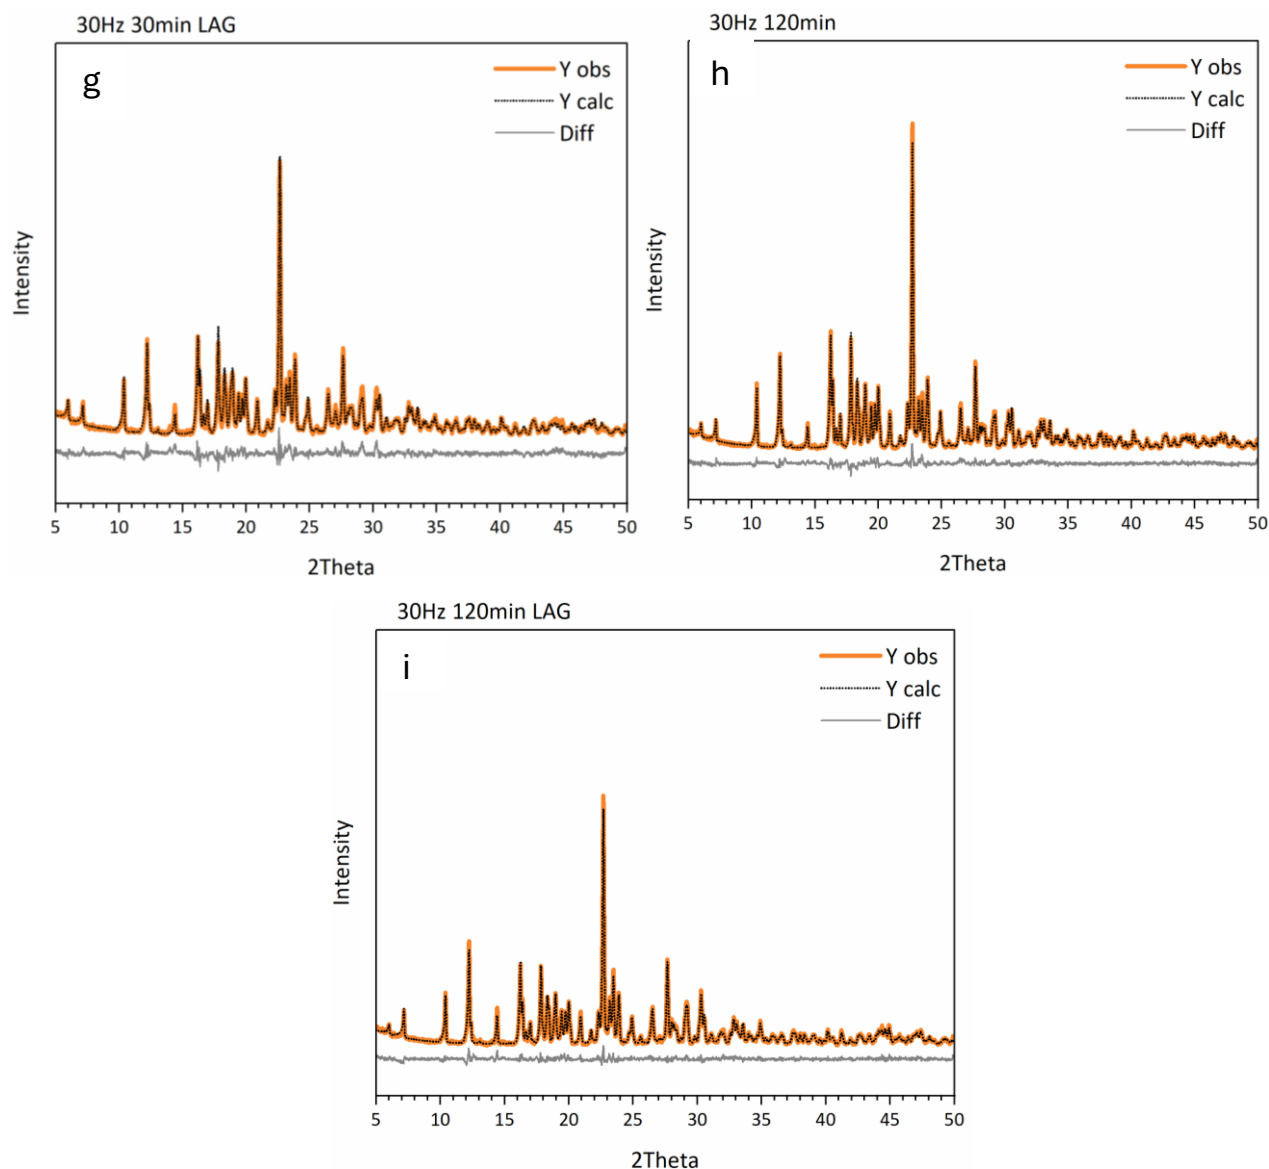

Figure S4. Rietveld refinement performed on outcome treated in mechanochemical conditions a) at 20Hz 5min, b) 25Hz 5min, c) 20Hz 30min, d) 25Hz 30min, e) 30Hz 5min, f) 30Hz 30min, g) 30Hz 30min with LAG (THF), h) 30Hz 120min, i) 30Hz 120min with LAG (THF). Experimental data are reported in orange dots while calculated pattern by Rietveld Refinement are reported in solid black line. Differential pattern  $Y_{\text{calc}} - Y_{\text{obs}}$  are reported in grey line.

Table S1. Mechanochemical reaction yields determined through quantitative phase analysis based on the weight percentage of Complex 2s relative to the total crystalline content in the reaction mixture.

| Milling conditions | $R_{\text{wp}}$ [%] | GOF   | Complex 2s | 4-Bromobenzoic acid | $\text{Zn}(\text{OAc})_2 \cdot 2\text{H}_2\text{O}$ | YIELD [%]    |
|--------------------|---------------------|-------|------------|---------------------|-----------------------------------------------------|--------------|
|                    |                     |       | Weight %   | Weight %            | Weight %                                            |              |
| 20Hz - 5 min       | 6.47                | 1.570 | 67.92      | 23.77               | 8.30                                                | <b>60.82</b> |
| 20Hz - 30 min      | 6.03                | 1.446 | 72.08      | 20.12               | 7.78                                                | <b>66.39</b> |
| 25Hz - 5 min       | 6.04                | 1.437 | 68.06      | 26.71               | 5.21                                                | <b>60.94</b> |
| 25Hz - 30 min      | 6.21                | 1.485 | 70.46      | 23.82               | 5.71                                                | <b>68.10</b> |
| 30Hz - 5 min       | 7.66                | 1.128 | 73.06      | 21.26               | 5.67                                                | <b>78.26</b> |
| 30Hz - 30 min      | 7.01                | 1.551 | 89.69      | 7.15                | 3.14                                                | <b>82.02</b> |
| 30Hz - 120 min     | 6.67                | 1.520 | 93.56      | 4.92                | 1.51                                                | <b>86.80</b> |
| 30Hz - 5 min LAG   | 8.09                | 1.097 | 82.76      | 16.01               | 1.21                                                | <b>80.53</b> |
| 30Hz - 30 min LAG  | 8.65                | 1.823 | 88.56      | 9.29                | 2.14                                                | <b>91.96</b> |
| 30Hz - 120 min LAG | 6.56                | 1.417 | 97.50      | 1.27                | 1.21                                                | <b>97.28</b> |

## VT-PXRD of 2m dehydration

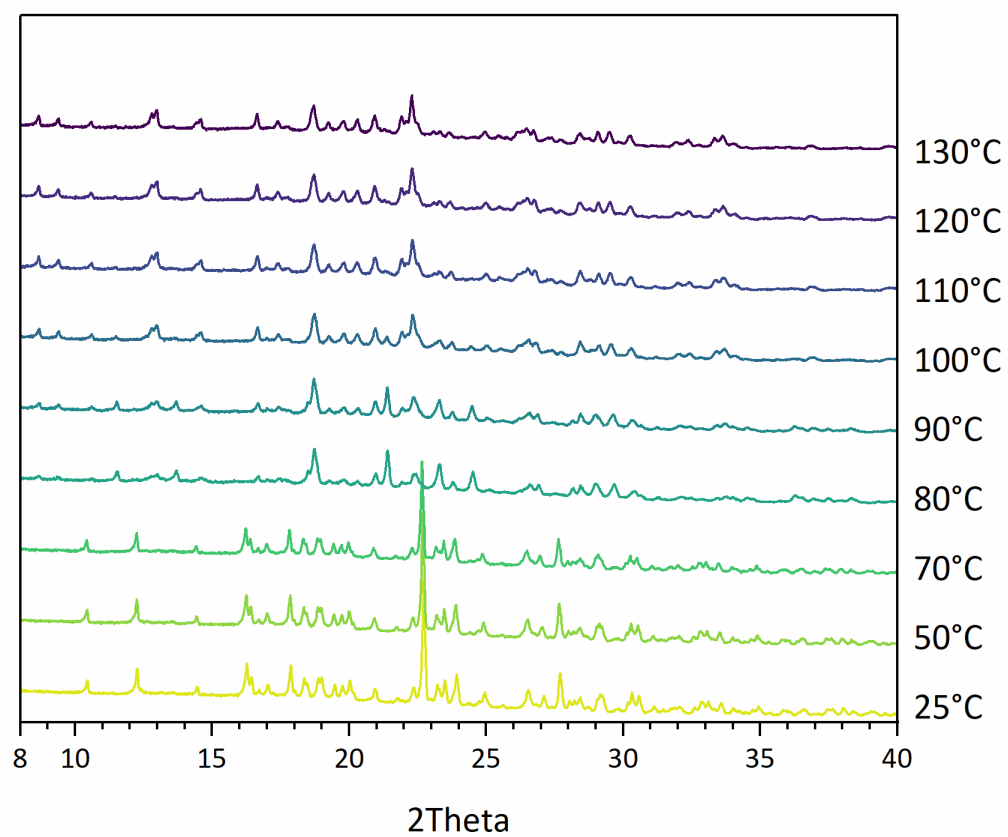

Figure S5. Variable temperature X-Ray powder diffraction analysis on complex **2m**; patterns were collected at 25°C, 50°C, 70°C, 80°C, 90°C, 100°C, 110°C, 120°C, 130°C.

## Thermogravimetric analysis

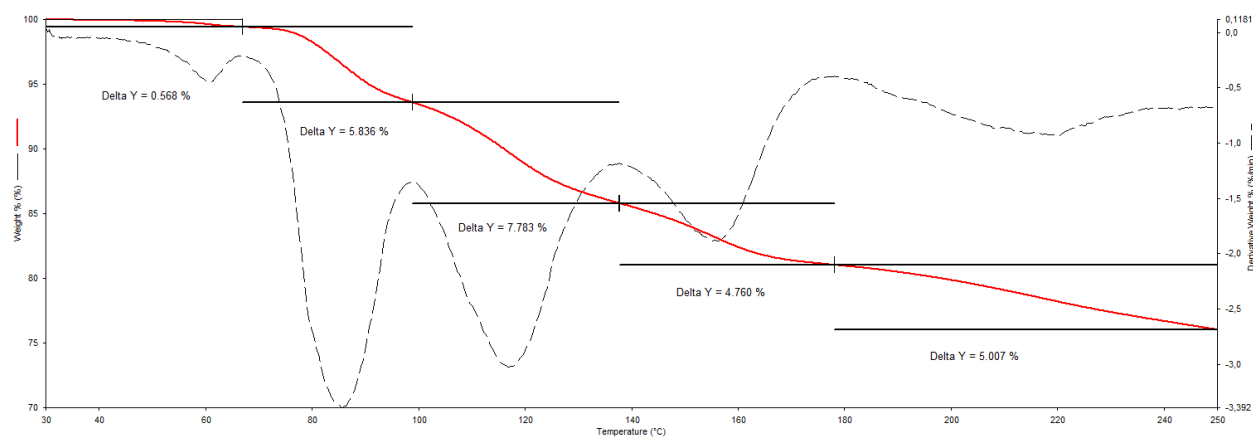

Figure S6. TGA of **2m**, starting from 30° to 250° at 5°/min, with the calculated weight losses percentages

## Crystal Structure solved by Single Crystal X-Ray Diffraction

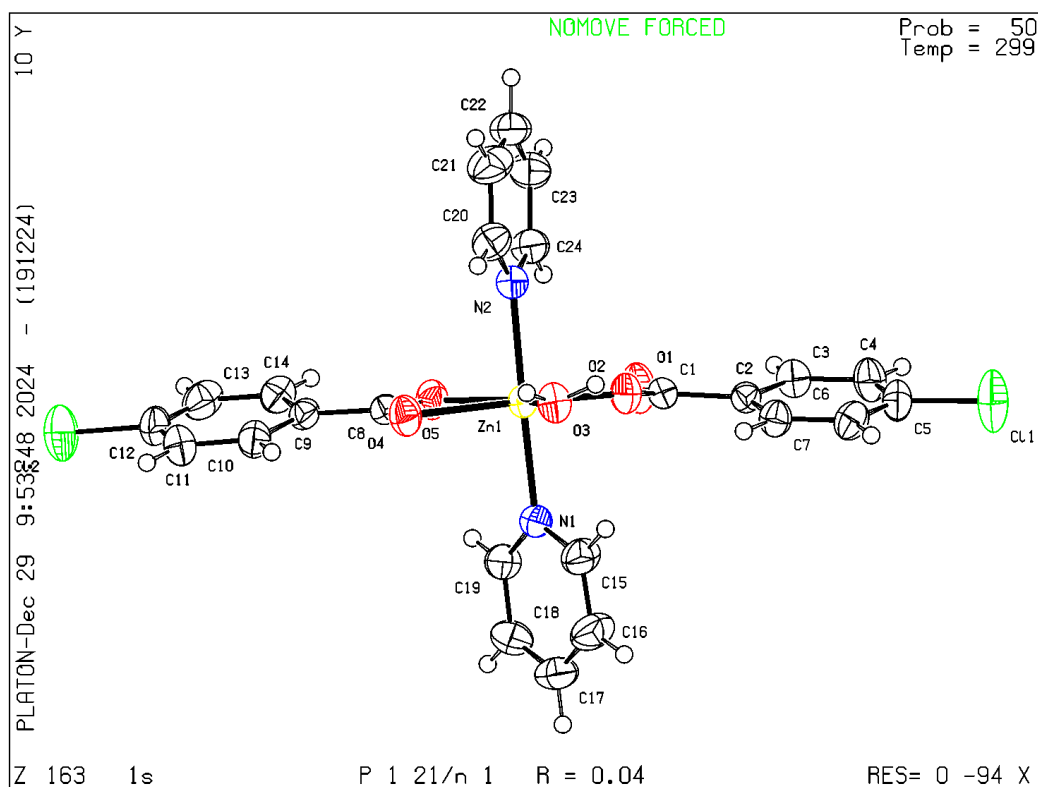

Figure S7. Ortep drawing of **1s**. All non-hydrogen atoms are shown as ellipsoids at the 50% probability level. H atoms (isotropically refined) are reported in ball-and-stick style for the sake of clarity. Color code: red=O, blue=N, gray=C, white=H.

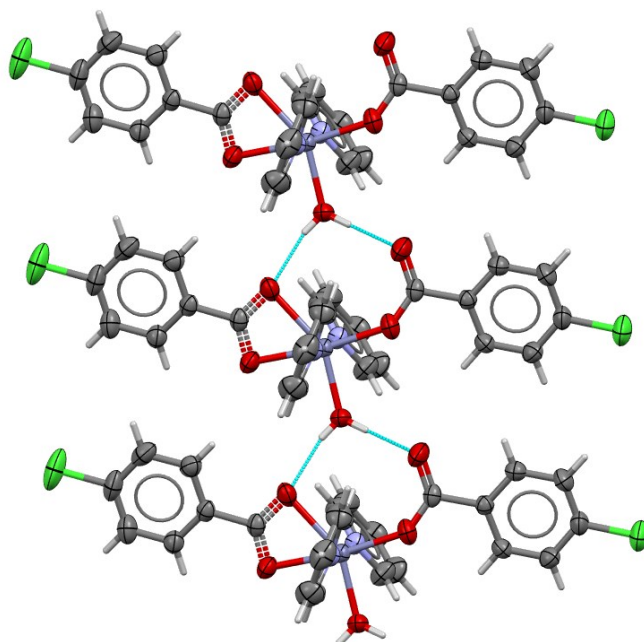

Figure S8. Interchain H-bond contacts in **1s** are reported in dotted cyan lines, running along crystallographic b-axis.



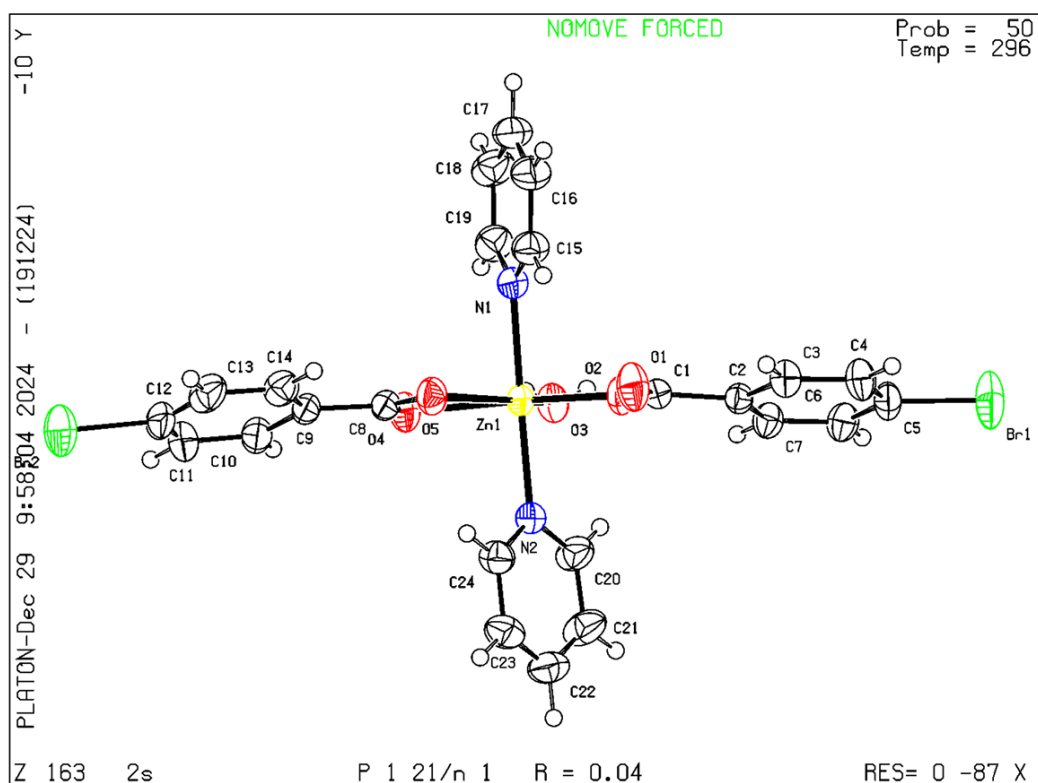

Figure S9. Ortep drawing of **2s** as obtained from the PLATON Check-cif routine. All non-hydrogen atoms are shown as ellipsoids at the 50% probability level. H atoms (isotropically refined) are reported in ball-and-stick style for the sake of clarity. Color code: red=O, blue=N, white=C-H.

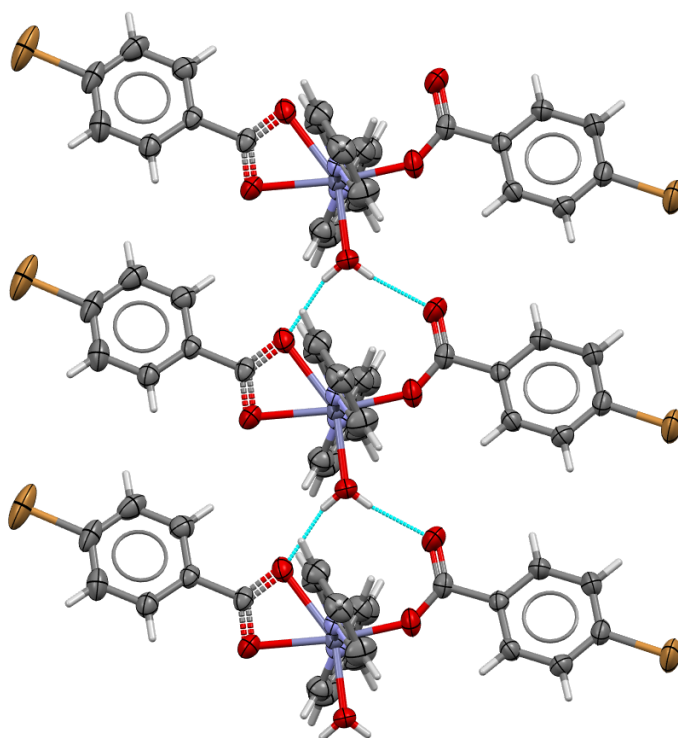

Figure S10. Interchain H-bond contacts in **2s** are reported in dotted cyan lines, running along crystallographic b-axis.

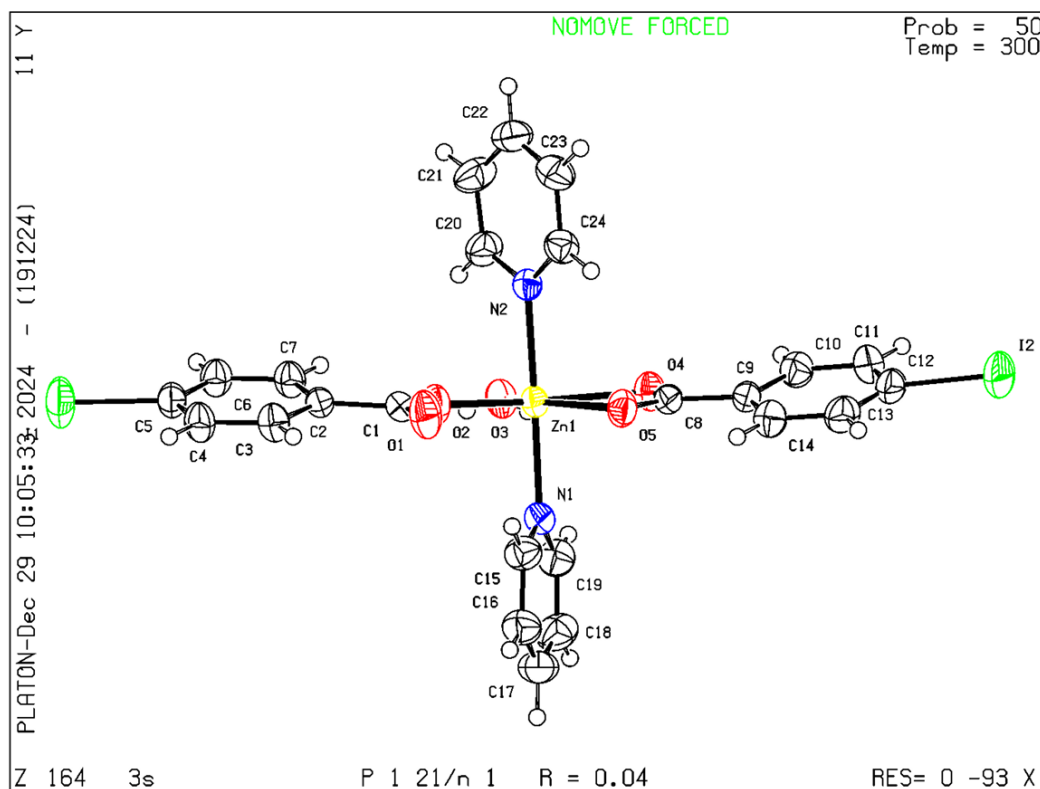

Figure S11. Ortep drawing of **3s** as obtained from the PLATON Check-cif routine. All non-hydrogen atoms are shown as ellipsoids at the 50% probability level. H atoms (isotropically refined) are reported in ball-and-stick style for the sake of clarity. Color code: red=O, blue=N, white=C-H.

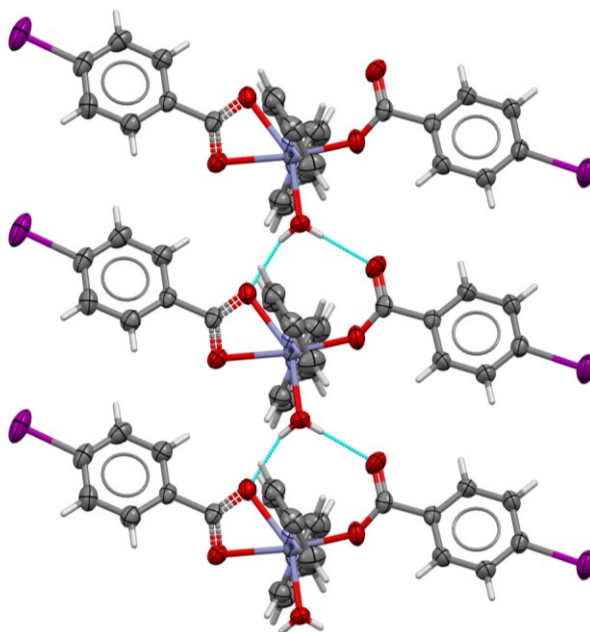

Figure S12. Interchain H-bond contacts in **3s** are reported in dotted cyan lines, running along crystallographic b-axis.

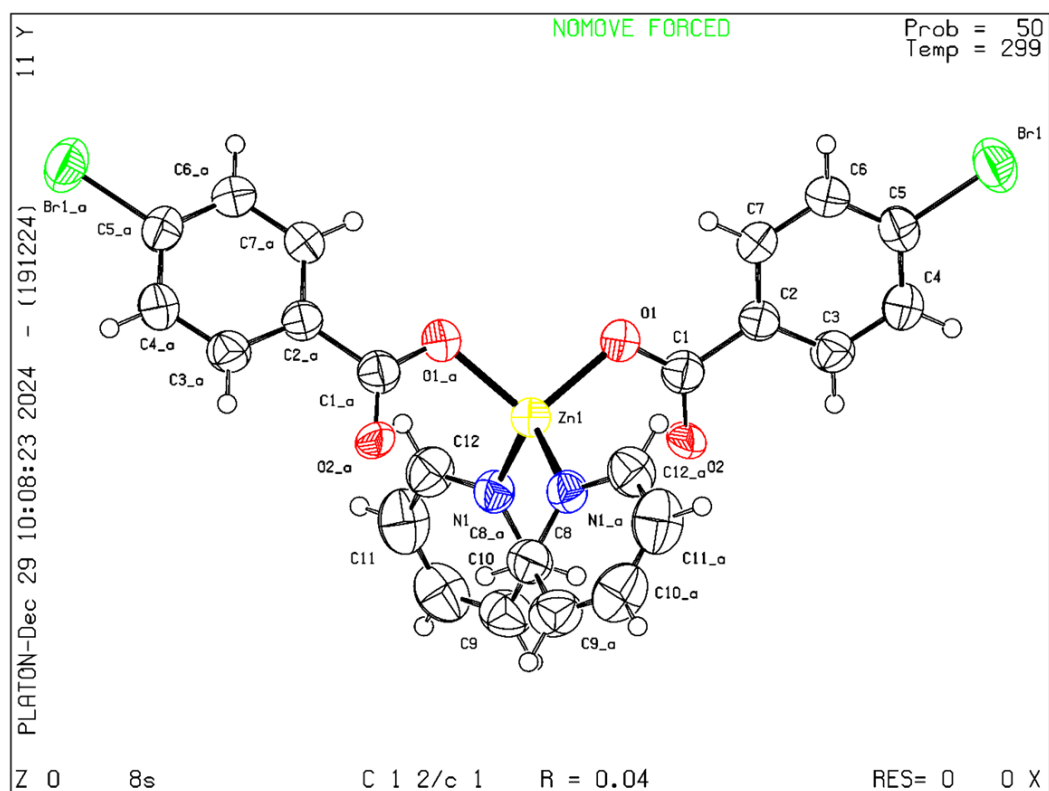

Figure S13. Ortep drawing of **8s** as obtained from the PLATON Check-cif routine. All non-hydrogen atoms are shown as ellipsoids at the 50% probability level. H atoms (isotropically refined) are reported in ball-and-stick style for the sake of clarity. Color code: red=O, blue=N, white=C-H.

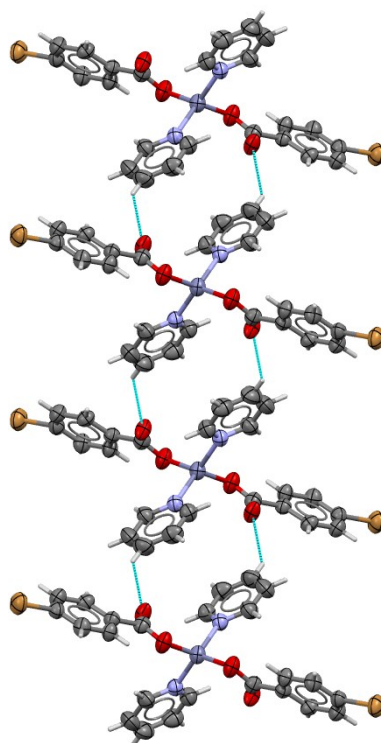

Figure S14. Interchain contacts in **8s** are reported in dotted cyan lines, running along crystallographic c-axis

## Crystallographic tables

Table S2. Crystal data and structure refinement for **1s**, **2s**, **3s** and **8s**.

| Identification code                         | 1s                                                                               | 2s                                                                               | 3s                                                                              | 8s                                                                               |
|---------------------------------------------|----------------------------------------------------------------------------------|----------------------------------------------------------------------------------|---------------------------------------------------------------------------------|----------------------------------------------------------------------------------|
| Empirical formula                           | C <sub>24</sub> H <sub>20</sub> Cl <sub>2</sub> N <sub>2</sub> O <sub>5</sub> Zn | C <sub>24</sub> H <sub>20</sub> Br <sub>2</sub> N <sub>2</sub> O <sub>5</sub> Zn | C <sub>24</sub> H <sub>20</sub> I <sub>2</sub> N <sub>2</sub> O <sub>5</sub> Zn | C <sub>24</sub> H <sub>18</sub> Br <sub>2</sub> N <sub>2</sub> O <sub>4</sub> Zn |
| Formula weight                              | 552.69                                                                           | 641.61                                                                           | 735.59                                                                          | 623.59                                                                           |
| Temperature/K                               | 299.00                                                                           | 296.00                                                                           | 300.00                                                                          | 299.00                                                                           |
| Crystal system                              | monoclinic                                                                       | monoclinic                                                                       | monoclinic                                                                      | monoclinic                                                                       |
| Space group                                 | P2 <sub>1</sub> /n                                                               | P2 <sub>1</sub> /n                                                               | P2 <sub>1</sub> /n                                                              | C2/c                                                                             |
| a/Å                                         | 15.130(4)                                                                        | 15.382(6)                                                                        | 15.755(3)                                                                       | 25.7920(9)                                                                       |
| b/Å                                         | 5.8821(15)                                                                       | 5.866(2)                                                                         | 5.8553(8)                                                                       | 6.1334(2)                                                                        |
| c/Å                                         | 27.358(6)                                                                        | 27.370(9)                                                                        | 27.436(7)                                                                       | 15.1547(6)                                                                       |
| α/°                                         | 90                                                                               | 90                                                                               | 90                                                                              | 90                                                                               |
| β/°                                         | 101.212(8)                                                                       | 100.924(5)                                                                       | 100.130(7)                                                                      | 91.997(2)                                                                        |
| γ/°                                         | 90                                                                               | 90                                                                               | 90                                                                              | 90                                                                               |
| Volume/Å <sup>3</sup>                       | 2388.3(10)                                                                       | 2424.9(15)                                                                       | 2491.5(8)                                                                       | 2395.91(15)                                                                      |
| Z                                           | 4                                                                                | 4                                                                                | 4                                                                               | 4                                                                                |
| ρ <sub>calc</sub> /g/cm <sup>3</sup>        | 1.537                                                                            | 1.757                                                                            | 1.961                                                                           | 1.729                                                                            |
| μ/mm <sup>-1</sup>                          | 1.291                                                                            | 4.347                                                                            | 3.502                                                                           | 5.613                                                                            |
| F(000)                                      | 1128.0                                                                           | 1272.0                                                                           | 1416.0                                                                          | 1232.0                                                                           |
| Crystal size/mm <sup>3</sup>                | 0.2 × 0.125 × 0.05                                                               | 0.25 × 0.25 × 0.06                                                               | 0.25 × 0.25 × 0.06                                                              | 0.25 × 0.25 × 0.06                                                               |
| Radiation                                   | MoKα (λ = 0.71073)                                                               | MoKα (λ = 0.71073)                                                               | MoKα (λ = 0.71073)                                                              | CuKα (λ = 1.54178)                                                               |
| 2θ range for data collection/°              | 4.838 to 56.638                                                                  | 5.394 to 56.562                                                                  | 4.816 to 56.698                                                                 | 6.858 to 140.336                                                                 |
| Index ranges                                | -19 ≤ h ≤ 20,<br>-7 ≤ k ≤ 7,<br>-36 ≤ l ≤ 34                                     | -20 ≤ h ≤ 18,<br>-7 ≤ k ≤ 7,<br>-36 ≤ l ≤ 36                                     | -20 ≤ h ≤ 21,<br>-7 ≤ k ≤ 7,<br>-36 ≤ l ≤ 36                                    | -31 ≤ h ≤ 31,<br>-7 ≤ k ≤ 7,<br>-16 ≤ l ≤ 18                                     |
| Reflections collected                       | 71946                                                                            | 73004                                                                            | 68138                                                                           | 18782                                                                            |
| Independent reflections                     | 5915<br>R <sub>int</sub> = 0.0954,<br>R <sub>sigma</sub> = 0.0450                | 5994<br>R <sub>int</sub> = 0.0567,<br>R <sub>sigma</sub> = 0.0294                | 6214<br>R <sub>int</sub> = 0.0598<br>R <sub>sigma</sub> = 0.0329                | 2281<br>R <sub>int</sub> = 0.0555<br>R <sub>sigma</sub> = 0.0295                 |
| Data/restraints/parameters                  | 5915/0/315                                                                       | 5994/0/315                                                                       | 6214/0/315                                                                      | 2281/0/150                                                                       |
| Goodness-of-fit on F <sup>2</sup>           | 1.030                                                                            | 1.046                                                                            | 1.024                                                                           | 1.029                                                                            |
| Final R indexes [I > 2σ (I)]                | R <sub>1</sub> = 0.0419,<br>wR <sub>2</sub> = 0.0878                             | R <sub>1</sub> = 0.0389,<br>wR <sub>2</sub> = 0.0954                             | R <sub>1</sub> = 0.0372,<br>wR <sub>2</sub> = 0.0791                            | R <sub>1</sub> = 0.0307,<br>wR <sub>2</sub> = 0.0736                             |
| Final R indexes [all data]                  | R <sub>1</sub> = 0.0602,<br>wR <sub>2</sub> = 0.0976                             | R <sub>1</sub> = 0.0477,<br>wR <sub>2</sub> = 0.1002                             | R <sub>1</sub> = 0.0515,<br>wR <sub>2</sub> = 0.0876                            | R <sub>1</sub> = 0.0420,<br>wR <sub>2</sub> = 0.0808                             |
| Largest diff. peak/hole / e Å <sup>-3</sup> | 0.79/-0.49                                                                       | 1.80/-1.54                                                                       | 1.31/-1.81                                                                      | 0.28/-0.41                                                                       |
